# Supplementary material for: Anaesthesia and airway management in mucopolysaccharidosis
Source: Springer Nature journal article supplement (doi:10.1007/s10545-012-9563-1), 2012-11-29
Supplement: MOESM2 [file 8835434]

### **Clinical background and preoperative evaluation**

- 15-year old boy, 35 kg, with long tract signs from compression of the cervical spine
- History of noisy breathing and OSA
- Pre-operative CT thorax showed narrowing at laryngeal level and lower in the thorax
- Procedure initially delayed due to concern of tracheal stenosis
- Preoperative plan: examine fiberoptically and decide whether to proceed

### **CT thorax and bronchoscopy**

- Glottic narrowing
- Kinking in trachea

### **Between evaluation and procedure**

- 3 episodes of collapse, 2 requiring resuscitation, over 3 months

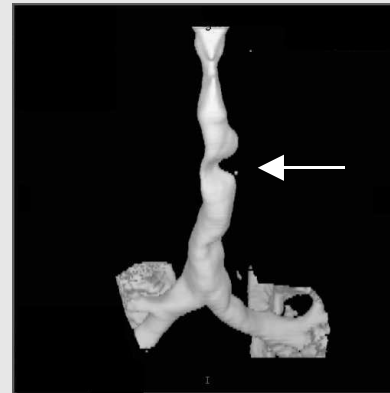

### **Procedure**

- Anaesthetised in lateral position with sevoflurane in oxygen
- Fiberoptic intubation using a small plain tube
- Tracheostomy performed with the tip placed distal to the tracheal narrowing
- Procedure carried out and good recovery
