# Supplementary material for: Anaesthesia and airway management in mucopolysaccharidosis
Source: Springer Nature journal article supplement (doi:10.1007/s10545-012-9563-1), 2012-11-29
Supplement: MOESM3 [file 8835434]

### Clinical background

- 19-year old girl, small stature, 25 kg, presented for corneal graft surgery
- Pre-operative fiberoptic bronchoscopy on 3 occasions in previous 3 years showed thickened and narrowed glottic anatomy
- Recent decompression of spinal cord at craniocervical junction: patient remained intubated and ventilated for 3 days, followed by successful extubation
- Increasing hoarseness on presentation for corneal graft surgery

### Procedure

- General anaesthesia using fiberoptic intubation and inhalation induction
  - Airway deteriorated after loss of consciousness
  - insertion of LMA size 2 first and then changed to size 2.5 resulting in good O<sub>2</sub> saturation, but persistent degree of airway obstruction
  - fiberoptic bronchoscopy: revealed extremely thickened larynx
  - procedure abandoned to prevent further swelling
- Second trial of anaesthesia: same procedure, but airway less obstructed
  - LMA size 2.5 placed when level of anaesthesia was sufficient and airway seemed relatively unobstructed (required some chin lift with LMA in place)
  - again, bronchoscopy showed extremely narrowed airway
  - glottis sprayed via suction channel of fiberoptic scope with lidocaine, followed by 3 mL of 1/10,000 epinephrine to shrink structures
  - after a few minutes, trachea could be entered successfully, a guide wire was placed, and a Cook airway exchanger railroaded over the guide wire after removal of the bronchoscope
  - size 4.5 plain endotracheal tube railroaded over exchange catheter, but replaced by 4.5 mm microcuff endotracheal tube due to substantial leak
  - after 2 mL of air cuff, successful ventilation of patient albeit with a small leak
  - dexamethasone given during surgery to reduce any further glottic swelling
  - successful extubation in anaesthetic room and discharged home 1 day later

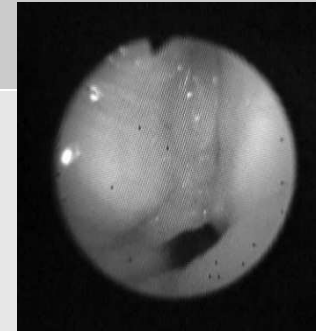

Endoscopic image showing thickening of larynx (laryngeal opening 3-4 mm)
